# Supplementary material for: Biopreservative and Anti-Mycotoxigenic Potentials of Lactobacillus paracasei MG847589 and Its Bacteriocin in Soft White Cheese
Source: MDPI journal article supplement (doi:10.3390/toxins16020093), 2024-02-07
Supplement: s1 [file s1]

# Biopreservative and Anti-Mycotoxigenic Potentials of *Lactobacillus paracasei* MG847589 and Its Bacteriocin in Soft White Cheese

Mohamed G. Shehata <sup>1,2</sup>, Tawfiq Alsulami <sup>3</sup>, Nourhan M. Abd El-Aziz <sup>1</sup>, Hagar S. Abd-Rabou<sup>1</sup>, Sobhy A. El Sohaimy <sup>1,4</sup>, Amira M. G. Darwish <sup>1</sup>, Karolina Hoppe <sup>5</sup>, Hatem S. Ali <sup>6</sup> and Ahmed Noah Badr <sup>7,\*</sup>

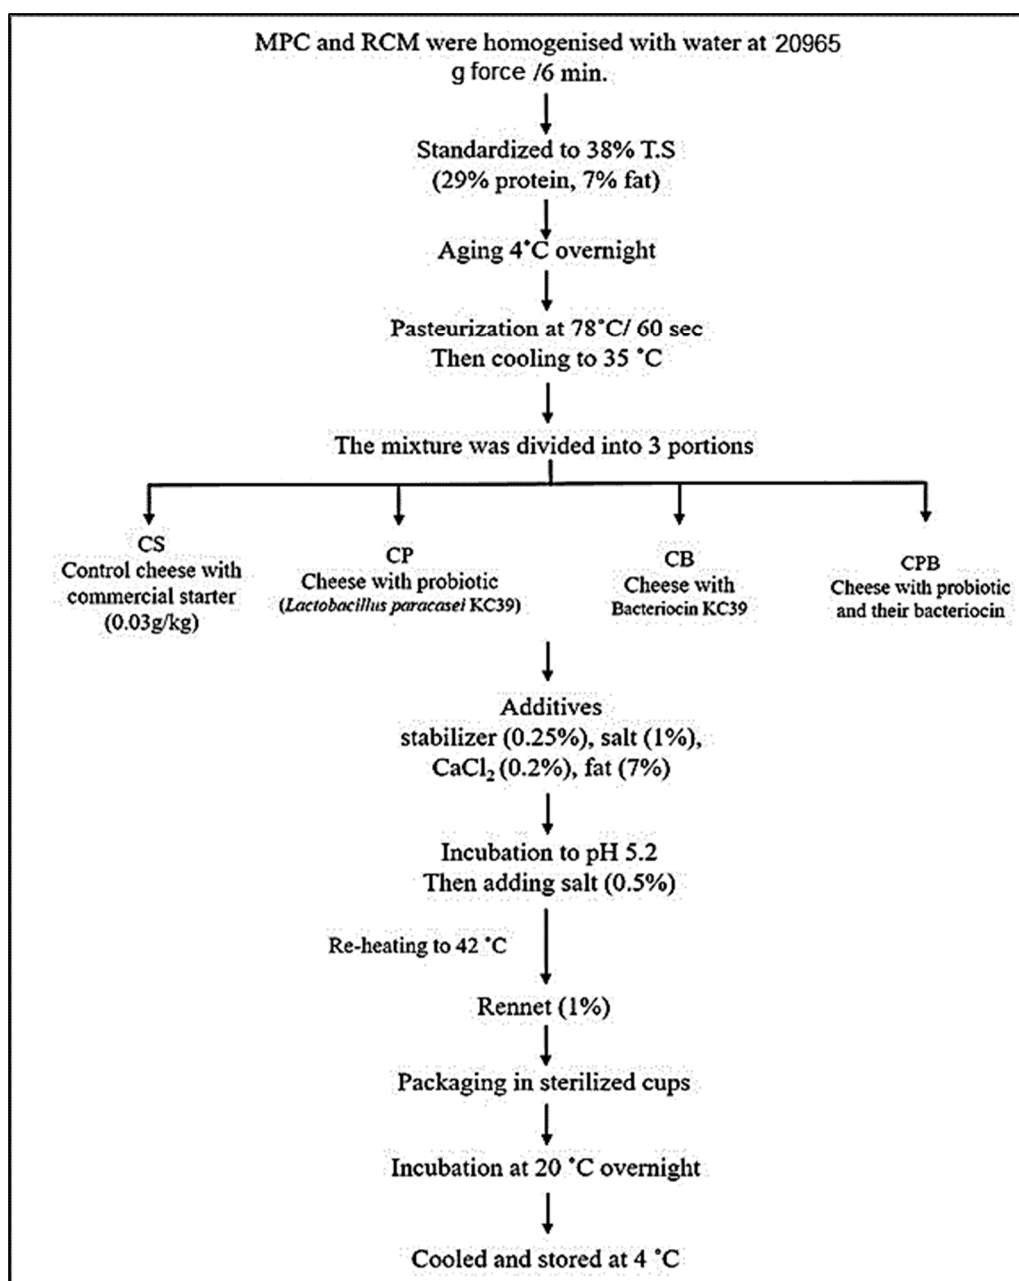

**Figure S1.** Diagram shows the steps of manufacturing functional soft white cheese MPC, Milk protein concentrate; RCM, Reconstituted skimmed milk.

Control cheese prepared with commercial starter (CS,  $1.81 \times 10^9$  CFU/mL), a probiotic cheese (CP;  $1.34 \times 10^9$  CFU/mL) of *L. paracasei* MG 847589, and a bacteriocin-supplemented cheese (CB; at 500 AU/mL).
